# Supplementary material for: Early Versus Delayed Non–Vitamin K Antagonist Oral Anticoagulant Therapy After Acute Ischemic Stroke in Atrial Fibrillation (TIMING): A Registry-Based Randomized Controlled Noninferiority Study
Source: PubMed Central journal article supplement — Circulation. 2022 Sep 6;146(14):1056–66. doi: 10.1161/CIRCULATIONAHA.122.060666 (PMC9648987; doi:10.1161/circulationaha.122.060666), 2022-09-06

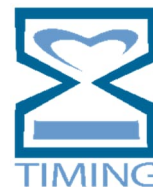

## **SUPPLEMENTAL MATERIAL**

### **Early versus delayed non-vitamin K antagonist oral anticoagulant therapy after acute ischemic stroke in atrial fibrillation (TIMING): a registry-based randomized controlled non-inferiority study**

Oldgren, Åsberg et al.

#### **Contents**

|                          |   |
|--------------------------|---|
| Outcome definition ..... | 2 |
| Table S1 .....           | 3 |
| Table S2 .....           | 4 |
| Figure S1 .....          | 5 |
| Figure S2 .....          | 6 |

## **Outcome definition**

The primary outcome event was a composite of recurrent ischemic stroke, symptomatic intracerebral hemorrhage, or all-cause death within 90 days of index stroke. Recurrent ischemic stroke was defined as a new focal neurological deficit of sudden onset lasting at least 24 h (or < 24 h if following therapeutic intervention, i.e. thrombolysis or thrombectomy, or if the deficit results in death within 24 h), occurring >24 hours after the index ischemic stroke, irrespective of vascular territory, and not attributable to edema, brain shift, hemorrhagic transformation, intercurrent illness, hypoxia, or drug toxicity.<sup>23</sup> Symptomatic intracerebral hemorrhage was defined as a new focal neurological deficit of sudden onset lasting for at least 24 h and with documented intraparenchymal hematoma ( $\geq 10$ mm) on imaging (computed tomography or magnetic resonance imaging), including hemorrhagic transformation of the index ischemic stroke; or a new hospitalization for intracerebral hemorrhage registered in the Swedish Stroke Register. Intracerebral hemorrhage was defined as symptomatic if there was an increase by  $\geq 4$  points in total National Institutes of Health Stroke Scale (NIHSS) or  $\geq 2$  points in one NIHSS category.<sup>24</sup>

Secondary outcome events included the individual components of the primary outcome event and major bleeding events. Bleedings were considered major if they resulted in death or were life-threatening, which includes all intracranial hemorrhages regardless of size and symptoms, according to the International Society on Thrombosis and Haemostasis definition;<sup>25</sup> or consumed major health-care resources, i.e. bleeding events leading to hospitalization.

**Table S1. TIMING sites and Principal investigators.**

| <b>Site</b>                                       | <b>Principal investigator</b> |
|---------------------------------------------------|-------------------------------|
| Alingsås Hospital                                 | Brita Eklund                  |
| Capio S:t Göran Hospital                          | Ulrika Löfmark                |
| County Hospital Ryhov                             | Jenny Persson                 |
| Danderyd University Hospital                      | Elisabeth Rooth               |
| Enköping Hospital                                 | Mikael Wiklund                |
| Falun Hospital                                    | Joakim Hambræus               |
| Gävle Hospital                                    | Ritva Jokela (deceased)       |
| Halland Hospital, Halmstad                        | Peter Thomasson Sommer        |
| Halland Hospital, Varberg                         | Henrik Berntsson              |
| Helsingborg Hospital                              | Maria Macek                   |
| Hudiksvall Hospital                               | Anette Onkenhout              |
| Hässleholm Hospital                               | Krzysztof Grodon              |
| Kalmar County hospital                            | Claes Williamsson             |
| Karolinska University Hospital, Huddinge          | Fariha Qureshi                |
| Karolinska University Hospital, Solna             | Boris Keselman                |
| Kiruna Hospital                                   | Lacramioara Grosu             |
| Kungälv Hospital                                  | Merja Henning                 |
| Lindesberg Hospital                               | Martin Johansson              |
| Motala Hospital                                   | Ulf Rosenqvist                |
| Mälarsjukhuset County Hospital                    | Bo Danielsson                 |
| Mölndal Hospital, Sahlgrenska University Hospital | Carolina Sixt                 |
| Nyköping Hospital                                 | Görel Wachtmeister            |
| Oskarshamn Hospital                               | Bongomin Otto                 |
| Sahlgrenska University Hospital                   | Annika Nordanstig             |
| Skaraborg Hospital Skövde                         | Björn Cederin                 |
| Skåne University Hospital, Malmö                  | Eva Ask                       |
| Sundsvall County Hospital                         | Fredrick Björck               |
| Södersjukhuset University Hospital                | Mihaela Oana Romanitan        |
| University Hospital of Umeå                       | Per Wester*                   |
| Uppsala University Hospital                       | Signild Åsberg*               |
| Västerås Central Hospital                         | Hannes Frejd                  |
| Västmanland Hospital, Köping                      | Jan Saaf                      |
| Örebro University Hospital                        | Jakob Ström                   |
| Östra Hospital, Sahlgrenska University Hospital   | Christina Hedén Ståhl         |

\*Steering committee member

**Table S2. Baseline characteristics in TIMING study patients and observational cohort**

| Variable                               | TIMING study patients<br>n=888 | Observational cohort at all stroke units*<br>n=9063 | Observational cohort at TIMING units†<br>n=5068 |
|----------------------------------------|--------------------------------|-----------------------------------------------------|-------------------------------------------------|
| Mean age, years (SD)                   | 78.3 (9.9)                     | 79.5 (9.3)                                          | 79.7 (9.5)                                      |
| Female sex, n (%)                      | 410 (46.2%)                    | 4224 (46.6%)                                        | 2418 (47.7%)                                    |
| Risk factors, n (%)                    |                                |                                                     |                                                 |
| Atrial fibrillation                    |                                |                                                     |                                                 |
| Previously known                       | 436 (49.1%)                    | 5993 (66.1%)                                        | 3521 (69.5%)                                    |
| Diagnosed on admission                 | 451 (50.8%)                    | 3071 (33.9%)                                        | 1548 (30.5%)                                    |
| Prior stroke                           | 155 (17.5%)                    | 1920 (21.2%)                                        | 1087 (21.4%)                                    |
| Prior TIA                              | 62 (7.0%)                      | 942 (10.4%)                                         | 521 (10.3%)                                     |
| Diabetes                               | 172 (19.4%)                    | 2205 (24.3%)                                        | 1224 (24.2%)                                    |
| Active smoking                         | 71 (8.0%)                      | 700 (7.7%)                                          | 397 (7.8%)                                      |
| ADL-independent before stroke, n (%)   | 820 (92.3%)                    | 6466 (71.3%)                                        | 3489 (68.8%)                                    |
| Living conditions before stroke, n (%) |                                |                                                     |                                                 |
| Own home w/o assistance                | 730 (82.2%)                    | 6566 (72.4%)                                        | 3584 (70.7%)                                    |
| Own home w assistance                  | 113 (12.7%)                    | 1803 (19.9%)                                        | 1068 (21.1%)                                    |
| Nursing home                           | 44 (5.0%)                      | 650 (7.2%)                                          | 394 (7.8%)                                      |
| Drugs on admission, n (%)              |                                |                                                     |                                                 |
| Antihypertensives                      | 671 (75.6%)                    | 7307 (80.6%)                                        | 4122 (81.3%)                                    |
| Statins                                | 327 (36.8%)                    | 3398 (37.5%)                                        | 1898 (37.5%)                                    |
| Antiplatelets                          |                                |                                                     |                                                 |
| Single                                 | 193 (21.7%)                    | 1677 (18.5%)                                        | 877 (17.3%)                                     |
| Dual                                   | 6 (0.7%)                       | 68 (0.8%)                                           | 37 (0.7%)                                       |
| None                                   | 689 (77.6%)                    | 6370 (70.3%)                                        | 3505 (69.2%)                                    |
| NOACs                                  |                                |                                                     |                                                 |
| Apixaban                               | 111 (12.5%)                    | 2685 (29.6%)                                        | 1557 (30.7%)                                    |
| Dabigatran                             | 26 (2.9%)                      | 347 (3.8%)                                          | 239 (4.7%)                                      |
| Edoxaban                               | 2 (0.2%)                       | 68 (0.8%)                                           | 35 (0.7%)                                       |
| Rivaroxaban                            | 36 (4.1%)                      | 643 (7.1%)                                          | 394 (7.8%)                                      |
| Warfarin                               | 65 (7.3%)                      | 722 (8.0%)                                          | 382 (7.5%)                                      |
| Mean initial INR (SD)                  | 1.96 (0.60)                    | 2.40 (1.47)                                         | 2.26 (1.06)                                     |
| NIHSS on admission                     |                                |                                                     |                                                 |
| Mean (SD)                              | 6.1 (5.9)                      | 5.4 (5.8)                                           | 5.2 (5.7)                                       |
| Median (IQR)                           | 4 (2-9)                        | 3 (1-8)                                             | 3 (1-7)                                         |
| Reperfusion therapy, n (%)             |                                |                                                     |                                                 |
| Thrombolysis                           | 252 (28.4%)                    | 1021 (11.3%)                                        | 531 (10.5%)                                     |
| Thrombectomy                           | 121 (13.6%)                    | 499 (5.5%)                                          | 288 (5.7%)                                      |

\*Observational cohort, see Figure S1; †Subset of Observational cohort (patients not enrolled in the randomized study) at TIMING stroke units.

The proportion of missing data in the observational cohorts were <1% for all variables except for smoking (14.5% for all units and 10.5% for non-randomized at TIMING units), ADL (1.4 and 1.4%), INR (39.2% and 36.9%) and NIHSS (35.0% and 28.7%). SD indicates standard deviation; TIA, transient ischemic attack; ADL, activities of daily living; NOAC, Non-vitamin K Antagonist Oral Anticoagulant; INR, international normalized ratio; NIHSS, National Institutes of Health Stroke Scale; and IQR, interquartile range.

**Figure S1. Study flow chart, observational cohort.**

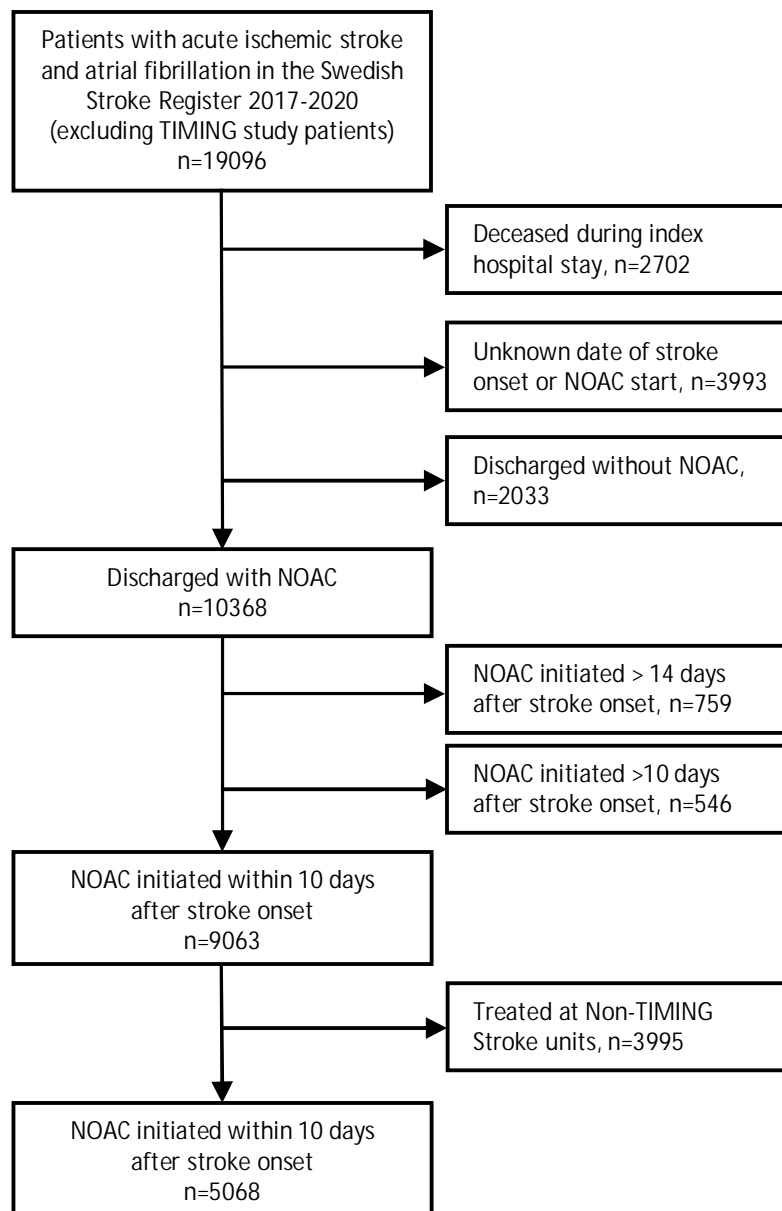

NOAC= Non vitamin K antagonist oral anticoagulant

**Figure S2. Time to A) primary composite outcome, B) ischemic stroke, and C) all-cause mortality for early versus delayed initiation of NOAC until 10 days.**

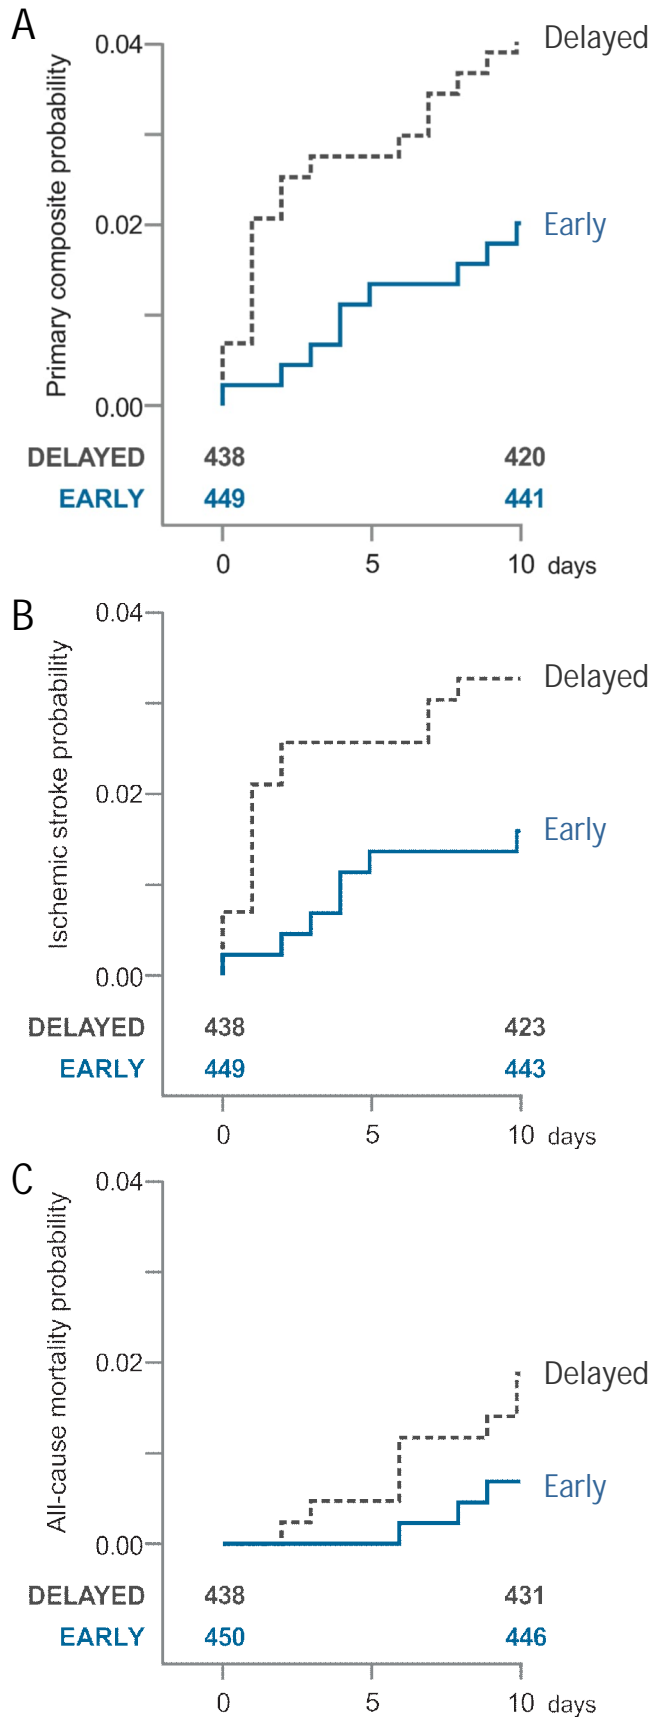

Supplement: cir-146-1056-s001.pdf [file cir-146-1056-s001.pdf]
